# Supplementary material
Source: Springer Nature journal article supplement (https://www.springermedizin.de/resource/supplementary/13054_2003_2870_MOESM2_ESM.pdf/9719182)

(a) **mesenteric blood flow**

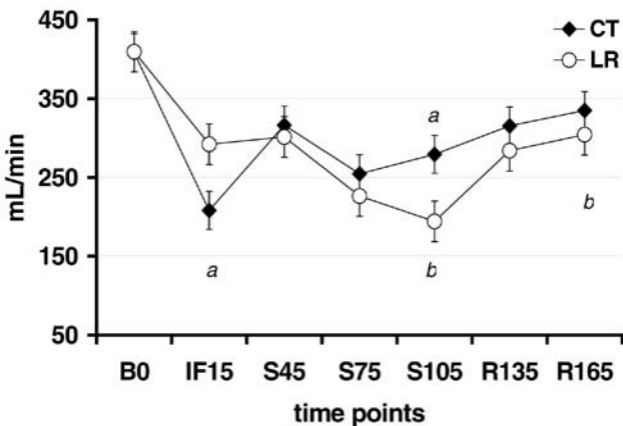

(b) **PCO<sub>2</sub>-gap**

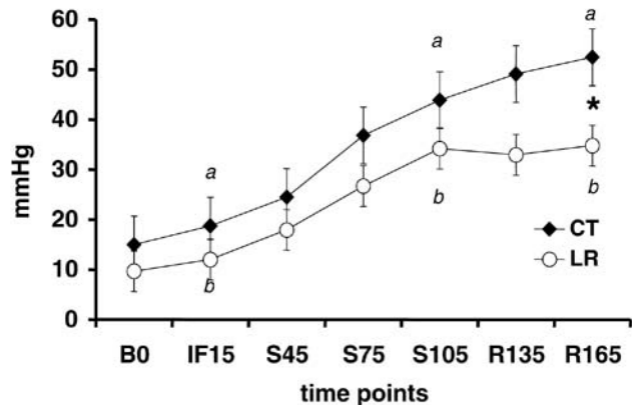

Supplement: MOESM2 [file 9719182]
